# Supplementary material for: Dementia Rehabilitation Training for General Practitioners and Practice Nurses: Does It Make a Difference?
Source: Preprints.org preprint supplement (doi:10.20944/preprints202408.1241.v1), 2024-08-16
Supplement: Supplementary file 2 [file supplementary]

Supplementary material A.

Optional follow-up learning activity

| Topic | Dementia | | |
| --- | --- | --- | --- |
| CPD | Self-reporting  Case review/analysis | Estimated duration | EA – 1 hour (Part 1)  RP– 2 hours |
| Date | Oct 23-Feb 2024 | | |
| Aim | To assist general practitioners, reflect on their approach to dementia care and referrals | | |
| Learning outcomes | - Be able to assess the 5 domains of the dementia framework and devise an appropriate care plan. - Build familiarity with dementia resources to assist people with dementia and their carers/family - Build knowledge of allied health professionals with an interest in dementia in your local area | | |

| Instructions |
| --- |
| **Part 1**   - Familiarise yourself with the SEMPHN dementia pathway website: [Dementia Pathways (semphn.org.au)](https://www.semphn.org.au/dementia) – Read the first five steps for the person living with dementia and for their carer/family member by clicking on the relevant section. - Review the Forward with Dementia General Practice referral flow chart for medical and psychosocial support after a diagnosis [dementia pathway part 2 concepts (forwardwithdementia.au)](https://forwardwithdementia.au/wp-content/uploads/2022/07/dementia-pathway-part-2-1.pdf) - Search your area for the nearest physiotherapist, speech pathologist and occupational therapist with an interest in dementia, gerontology or neurology. Private providers can be found through professional association websites:   - [Occupational Therapy Australia - Find an Occupational Therapist (otaus.com.au)](https://www.otaus.com.au/find-an-ot)   - [Find a Speech Pathologist (speechpathologyaustralia.org.au)](https://www.speechpathologyaustralia.org.au/SPAweb/Resources_for_the_Public/Find_a_Speech_Pathologist/SPAweb/Resources_for_the_Public/Find_a_Speech_Pathologist/All_Searches.aspx?hkey=0b04c883-80b2-43e7-9298-7e5db5c75197)   - <https://choose.physio/find-a-physio> - Can your patients access the dementia rehab program run by Encara [[New Dementia Rehabilitation Program for Mornington Peninsula and Casey residents (semphn.org.au)](https://www.semphn.org.au/news-dementia-rehabilitation-program)] - Do local community health or rehabilitation services see people with dementia? - Review the care plan example for Anna [Appendix A]   **Part 2**   - Find 3 patients who have a diagnosis of dementia in your practice and review what rehabilitation they have been offered (or see a new patient and start with point 2) - Invite them in to do (or review) a GPMP plan and Team care arrangement based on the five dementia domains. - Determine patient goals and offer resources and referrals as needed. - What funding pathways could they use to access allied health? E.g. public, private, GPMP and team care plan, MyAgedCare, NDIS; Encara’s dementia program?   **Part 3**  Having completed the above activities, reflect on:   - What you did differently after completing the learning activities? - How did you find the process? - What helped you? - What stopped you? - Did the person with dementia and their care partner find this useful? - Would you feel confident to do this as part of post diagnostic care in the future? - What other training, resources or services would you need?   ______________________________________________________________________  ______________________________________________________________________  ______________________________________________________________________  ______________________________________________________________________  ______________________________________________________________________  ______________________________________________________________________  ______________________________________________________________________  ______________________________________________________________________  ______________________________________________________________________  ______________________________________________________________________  ______________________________________________________________________  ______________________________________________________________________  ______________________________________________________________________  ______________________________________________________________________  ______________________________________________________________________ |
